# Supplementary material for: Equivalence of charged and neutral density functional formulations for correcting the many-body self-interaction of polarons
Source: Research Square preprint supplement (doi:10.21203/rs.3.rs-8160837/v1), 2025-12-03
Supplement: Supplementary file 1 [file 4258acd0b4b68b5f4cec0d87.pdf]

# Equivalence of charged and neutral density functional formulations for correcting the many-body self-interaction of polarons

Stefano Falletta,<sup>1,2,\*</sup> Jennifer Coulter,<sup>1</sup> Joel Varley,<sup>3</sup> Daniel Åberg,<sup>3</sup>  
Babak Sadigh,<sup>3</sup> Boris Kozinsky,<sup>1,4</sup> and Alfredo Pasquarello<sup>2</sup>

<sup>1</sup>*John A. Paulson School of Engineering and Applied Sciences, Harvard University, Cambridge, MA, USA*

<sup>2</sup>*Chaire de Simulation à l'Echelle Atomique (CSEA),*

*Ecole Polytechnique Fédérale de Lausanne (EPFL), CH-1015 Lausanne, Switzerland*

<sup>3</sup>*Lawrence Livermore National Laboratory, Livermore, California, USA*

<sup>4</sup>*Robert Bosch LLC Research and Technology Center, Watertown, MA, USA*

## I. RESULTS OBTAINED WITH UNIT-CELL METHOD FOR POLARONS

We illustrate the results obtained with the unit-cell method for the various polarons considered in this work. Specifically, in Fig. S1 we show the generalized Fourier amplitudes  $A_{n\mathbf{k}}$  and  $B_{\mathbf{q}\eta}$ , which describe the polaron wave function and the polaron lattice distortions, respectively. The strongly localized nature of small polarons is emphasized by the fact that the coefficients  $A_{n\mathbf{k}}$  are spread across the entire Brillouin zone. Similarly, the localized nature of polaronic lattice distortions is related to the fact that the coefficients  $B_{\mathbf{q}\eta}$  are spread across the phonon dispersion. In addition, we show in Fig. S1 the extrapolations of polaron formation energies for increasing  $\mathbf{k}$  meshes, which are used to determine the polaron formation energies in the dilute limit.

---

\* stefanofalletta@g.harvard.edu

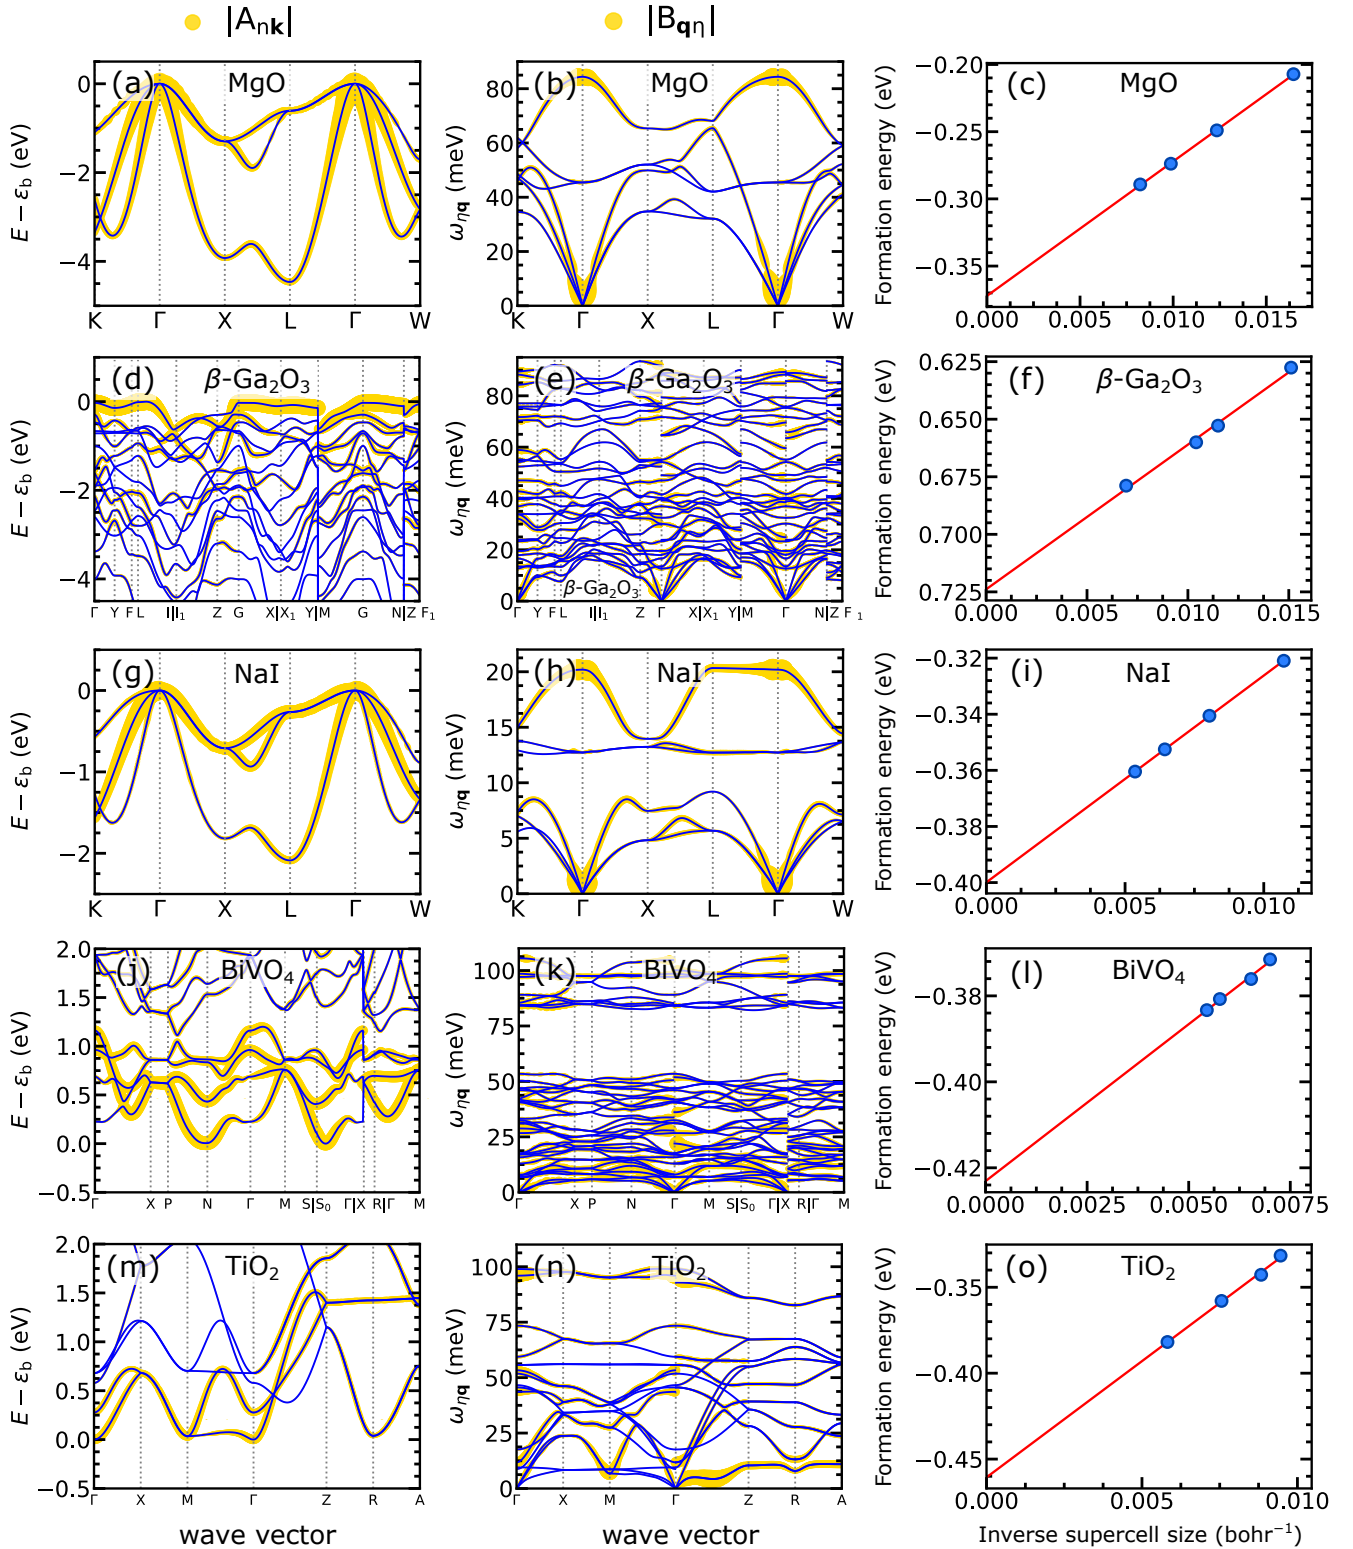

FIG. S1. Spectral decomposition of small polarons in MgO,  $\beta$ -Ga<sub>2</sub>O<sub>3</sub>, NaI, BiVO<sub>4</sub>, and TiO<sub>2</sub> as obtained with the unit-cell method. (a,d,g,j,m) Generalized Fourier amplitudes  $A_{n\mathbf{k}}$  plotted as circles on top of the band structure, with a radius proportional to  $|A_{n\mathbf{k}}|^2$ . Energies are referred to the top of the valence band for hole polarons, and to the top of the conduction band for electron polarons. (b,e,h,k,n) Generalized Fourier amplitudes  $B_{\mathbf{q}\eta}$  plotted as circles on top of the phonon dispersion, with a radius proportional to  $|B_{\mathbf{q}\eta}|^2$ . (c,f,i,l,o) Scaling with inverse supercell size  $L^{-1}$  of the polaron formation energy obtained by using increasingly dense  $\mathbf{k}$ -point meshes. The formation energies in the dilute limit are found by linear extrapolation.
